# Supplementary material for: Emergence of SARS-CoV-2 Omicron Variant JN.1 in Tamil Nadu, India - Clinical Characteristics and Novel Mutations
Source: Research Square preprint supplement (doi:10.21203/rs.3.rs-4285442/v1), 2024-04-22
Supplement: Supplementary file 1 [file 17ae05e6ac68327e8daab005.docx]

**Table 3:** Unique, dynamic, universal, and random mutations in the spike protein of JN.1 compared to the BA.2 sequence.

| **UNIQUE MUTATION** | | | | **DYNAMIC MUTATION** | | | **UNIVERSAL MUTATION** | | | **RANDOM MUTATION** | | | | |
| --- | --- | --- | --- | --- | --- | --- | --- | --- | --- | --- | --- | --- | --- | --- |
| NTD | RBD | SD | HR1/HR2 | NTD | RBD | SD | NTD | RBD | SD | NTD | RBD | SD | FP | HR1/HR2 |
| V83F | T33R | - | - | P85K | - | - | - | - | - | R21T | I332V | E554K | H681R | S939F |
| L84K | F456L | - | - | V90Y | - | - | - | - | - | A27S | G339H | A570V | - | P1143L |
| P85L | Q506P | - | - | - | - | - | - | - | - | S50L | R346T | P621S | - |  |
| F86L | P507T | - | - | - | - | - | - | - | - | V127F | K356T | - | - | - |
| N87I | - | - | - | - | - | - | - | - | - | F157S | S375F | - | - | - |
| D88V | - | - | - | - | - | - | - | - | - | R158G | T376A | - | - | - |
| V90L | - | - | - | - | - | - | - | - | - | L212I | R403K | - | - | - |
| Q218L | - | - | - | - | - | - | - | - | - | L216F | V445H | - | - | - |
| Y170E | - | - | - | - | - | - | - | - | - | H245N | G446S | - | - | - |
| T307Q | - | - | - | - | - | - | - | - | - | A264D | N450D | - | - | - |
| - | - | - | - | - | - | - | - | - | - | - | L452W | - | - | - |
| - | - | - | - | - | - | - | - | - | - | - | L455W | - | - | - |
| - | - | - | - | - | - | - | - | - | - | - | N460K | - | - | - |
| - | - | - | - | - | - | - | - | - | - | - | N481K | - | - | - |
| - | - | - | - | - | - | - | - | - | - | - | A484K | - | - | - |
| - | - | - | - | - | - | - | - | - | - | - | F486P | - | - | - |
| - | - | - | - | - | - | - | - | - | - | - | R493Q | - | - | - |
| - | - | - | - | - | - | - | - | - | - | - | H505Y | - | - | - |
