# Supplementary material for: Emergence of SARS-CoV-2 Omicron Variant JN.1 in Tamil Nadu, India - Clinical Characteristics and Novel Mutations
Source: Research Square preprint supplement (doi:10.21203/rs.3.rs-4285442/v1), 2024-04-22
Supplement: Supplementary file 2 [file d177c11f9d2bacafbed2f578.docx]

**Table 2:** Unique, dynamic, universal, and random mutations in the spike protein of JN.1 compared to the *Wuhan-Hu-1* sequence.

| **UNIQUE MUTATION** | | | | **DYNAMIC MUTATION** | | | **UNIVERSAL MUTATION** | | | **RANDOM MUTATION** | | | | |
| --- | --- | --- | --- | --- | --- | --- | --- | --- | --- | --- | --- | --- | --- | --- |
| NTD | RBD | SD | HR1/HR2 | NTD | RBD | SD | NTD | RBD | SD | NTD | RBD | SD | FP | HR1/HR2 |
| V83F | V503A | P681R | S939F | P85K | - | P681H | G142D | N440K | D614G | T19I | G339H | N764K | D796Y | Q954H |
| L84K | - | M740I | V1104L | V90Y | - | - | T307Q | S477N | - | R21T | K356T | - | - | N969K |
| P85L | - | - | P1162L | - | - | - | - | N501Y | - | A27S | S371F | - | - | P1143L |
| F86L | - | - | - | - | - | - | - | - | - | S50L | S373P | - | - | - |
| N87I | - | - | - | - | - | - | - | - | - | V127F | S375F | - | - | - |
| D88V | - | - | - | - | - | - | - | - | - | F157S | T376A | - | - | - |
| V90L | - | - | - | - | - | - | - | - | - | R158G | R403K | - | - | - |
| Q218L | - | - | - | - | - | - | - | - | - | L212I | D405N | - | - | - |
| T20L | - | - | - | - | - | - | - | - | - | V213G | R408S | - | - | - |
| P26Q | - | - | - | - | - | - | - | - | - | L216F | K417N | - | - | - |
| D53E | - | - | - | - | - | - | - | - | - | H245N | V445H | - | - | - |
| F55L | - | - | - | - | - | - | - | - | - | A264D | G446S | - | - | - |
| S60F | - | - | - | - | - | - | - | - | - | - | N450D | - | - | - |
| N81S | - | - | - | - | - | - | - | - | - | - | L452W | - | - | - |
| P174S | - | - | - | - | - | - | - | - | - | - | L455S | - | - | - |
| A288S | - | - | - | - | - | - | - | - | - | - | N460K | - | - | - |
| - | - | - | - | - | - | - | - | - | - | - | T478K | - | - | - |
| - | - | - | - | - | - | - | - | - | - | - | N481K | - | - | - |
| - | - | - | - | - | - | - | - | - | - | - | E484K | - | - | - |
| - | - | - | - | - | - | - | - | - | - | - | F486P | - | - | - |
| - | - | - | - | - | - | - | - | - | - | - | Q498R | - | - | - |
| - | - | - | - | - | - | - | - | - | - | - | Y505H | - | - | - |
