# Supplementary material for: Emergence of SARS-CoV-2 Omicron Variant JN.1 in Tamil Nadu, India - Clinical Characteristics and Novel Mutations
Source: Research Square preprint supplement (doi:10.21203/rs.3.rs-4285442/v1), 2024-04-22
Supplement: Supplementary file 3 [file e12988a1ba7b8141e8ad7cfd.docx]

**Table 4:** Unique, dynamic, universal, and random mutations in the spike protein of JN.1 as compared to the XBB sequence.

| **UNIQUE MUTATION** | | | | **DYNAMIC MUTATION** | | | **UNIVERSAL MUTATION** | | | **RANDOM MUTATION** | | | | |
| --- | --- | --- | --- | --- | --- | --- | --- | --- | --- | --- | --- | --- | --- | --- |
| NTD | RBD | SD | HR1/HR2 | NTD | RBD | SD | NTD | RBD | SD | NTD | RBD | SD | FP | HR1/HR2 |
| A83V | N331K | - | - | A83F | T346I | - | - | - | - | R21T | I332V | E554K | H681R | S939F |
| L84K | T333R | - | - | V90Y | - | - | - | - | - | A27S | K356T | A570V | - | P1143L |
| P85K | N334S | - | - | - | - | - | - | - | - | S50L | I368L | P621S | - | - |
| F86L | T346R | - | - | - | - | - | - | - | - | V127F | R403K | - | - | - |
| N87I | F456L | - | - | - | - | - | - | - | - | Q146H | P445H | - | - | - |
| D88V | Q506P | - | - | - | - | - | - | - | - | F157S | N450D | - | - | - |
| V90L | P507T | - | - | - | - | - | - | - | - | R158G | L452W | - | - | - |
| F92V | - | - | - | - | - | - | - | - | - | E183Q | L455W | - | - | - |
| Y170E | - | - | - | - | - | - | - | - | - | L212I | N460K | - | - | - |
| Q218L | - | - | - | - | - | - | - | - | - | E213G | N481K | - | - | - |
| T315V | - | - | - | - | - | - | - | - | - | L216F | A484K | - | - | - |
| S316C | - | - | - | - | - | - | - | - | - | H245N | S486P | - | - | - |
| F318I | - | - | - | - | - | - | - | - | - | A264D | S490F | - | - | - |
| - | - | - | - | - | - | - | - | - | - | - | H505Y | - | - | - |
